# Supplementary material
Source: PubMed Central journal article supplement (PMC3289972)

# VTGGC(tBu)A-COOH

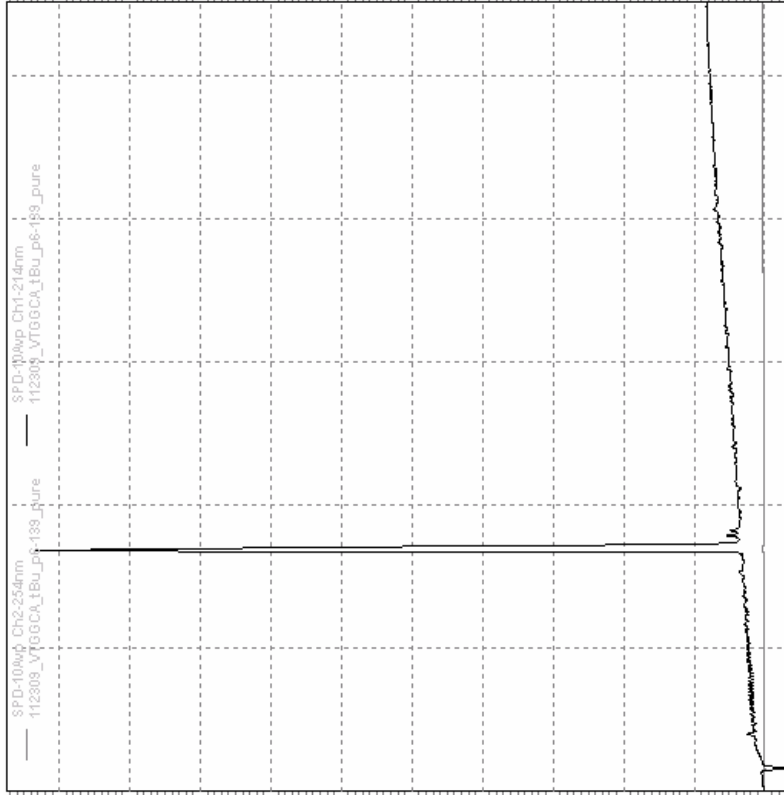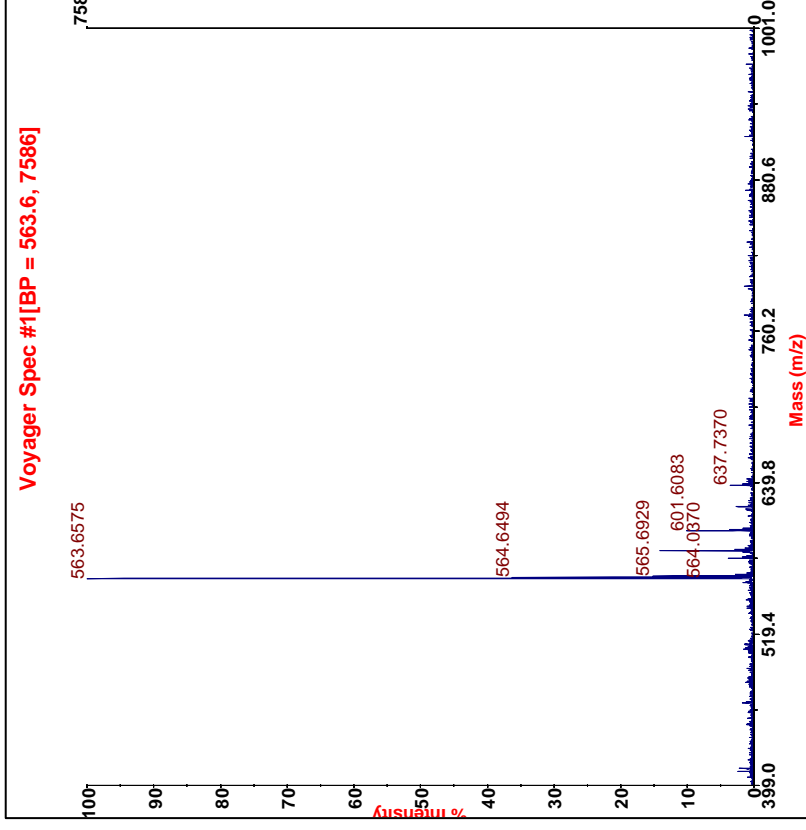

# VTGGC(StBu)A-COOH

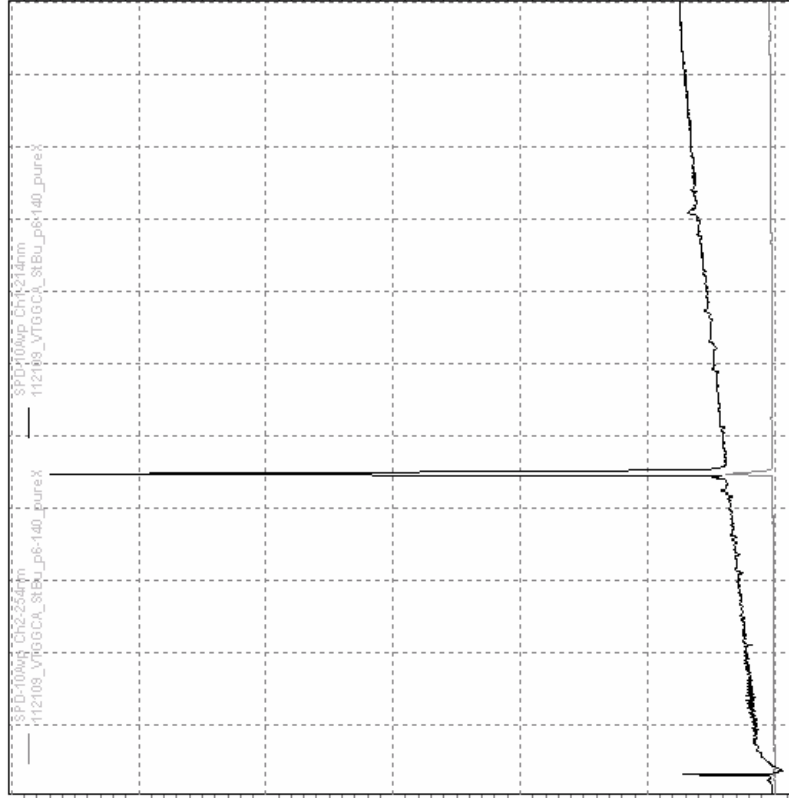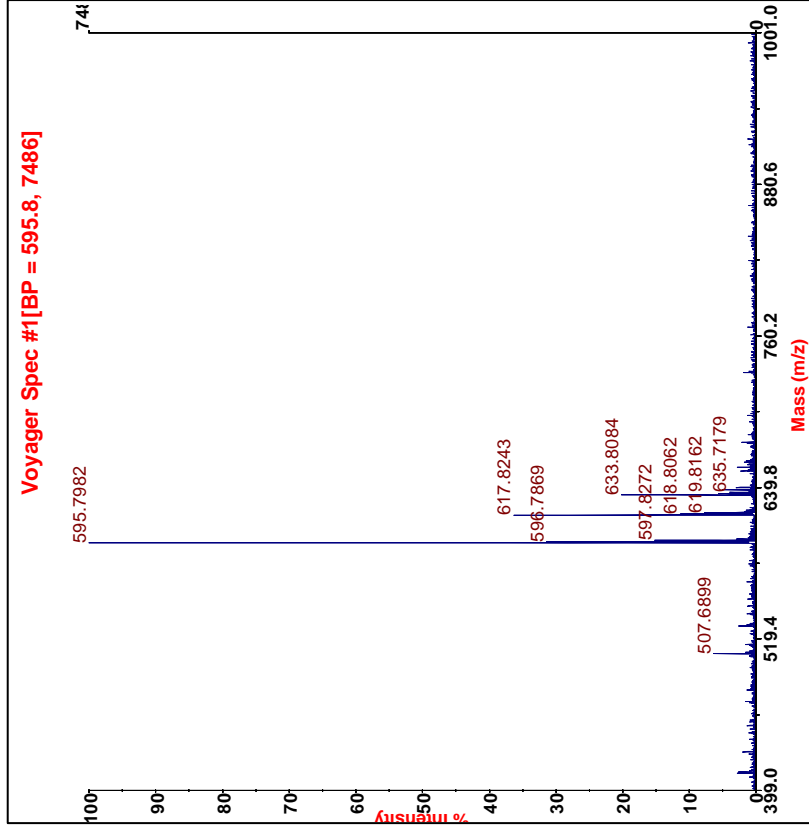

# VTGGC(Mob)A-COOH

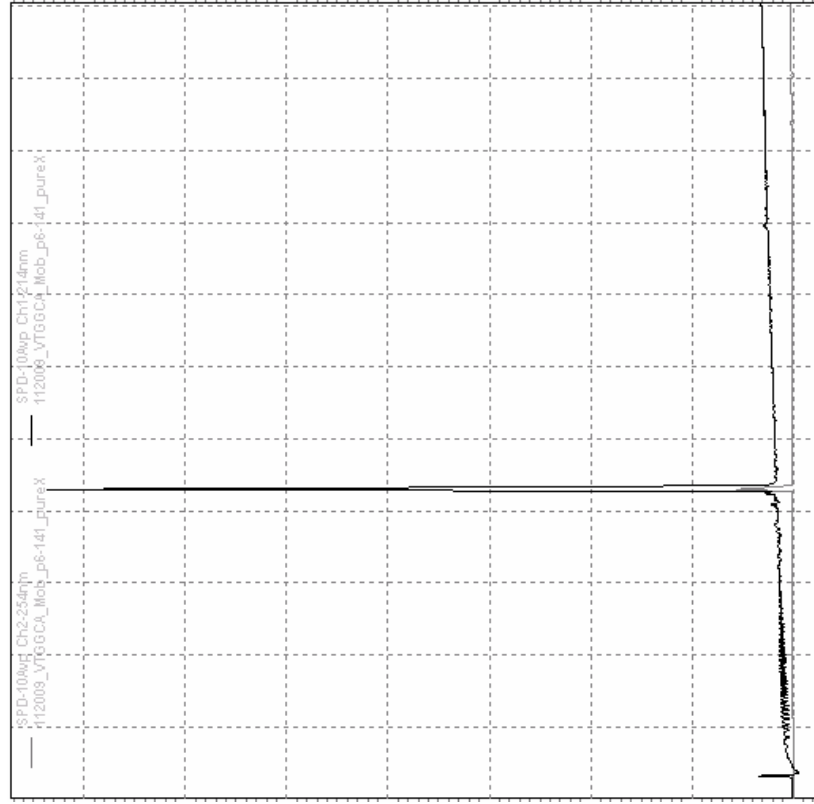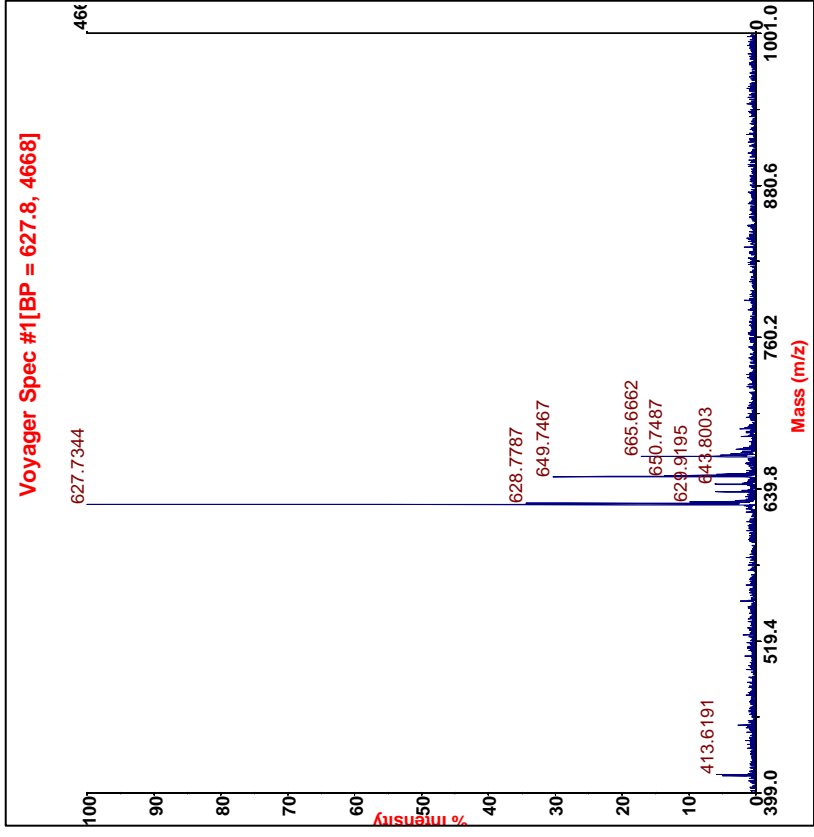

# VTGGC(Meb)A-COOH

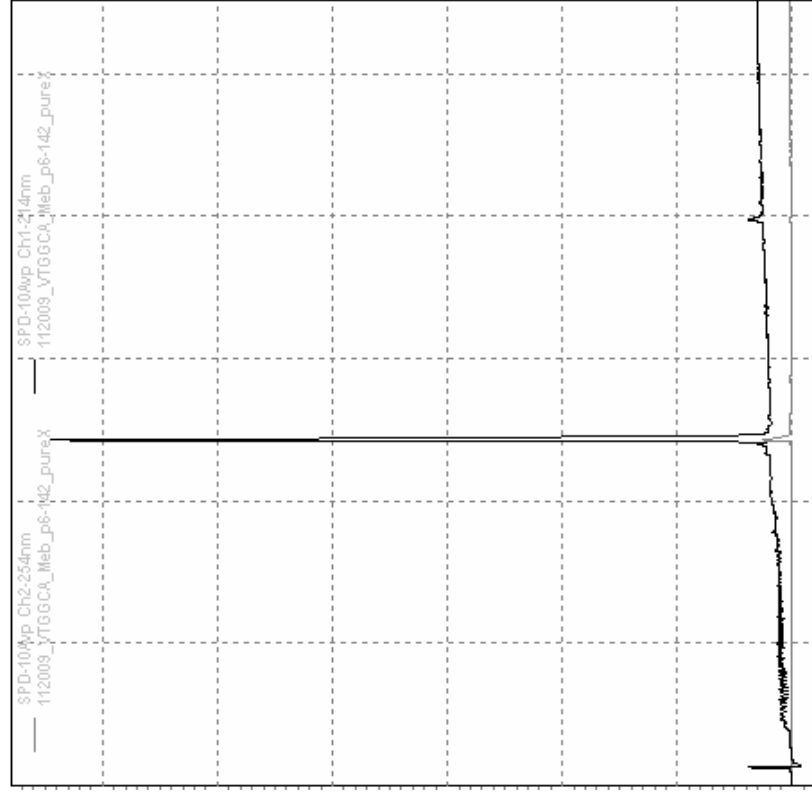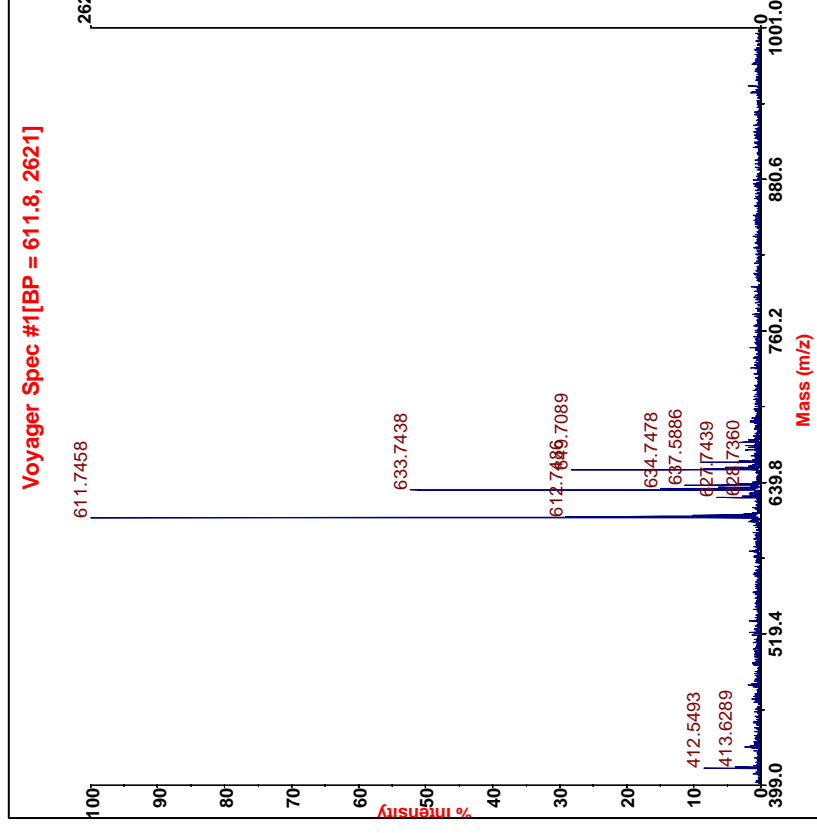

# VTGGC(Bzl)A-COOH

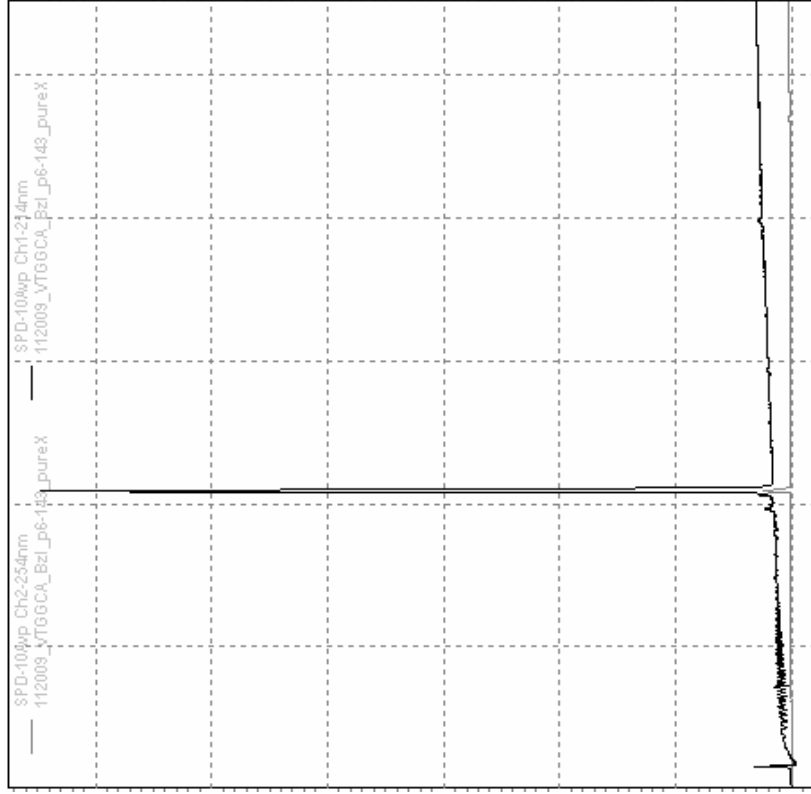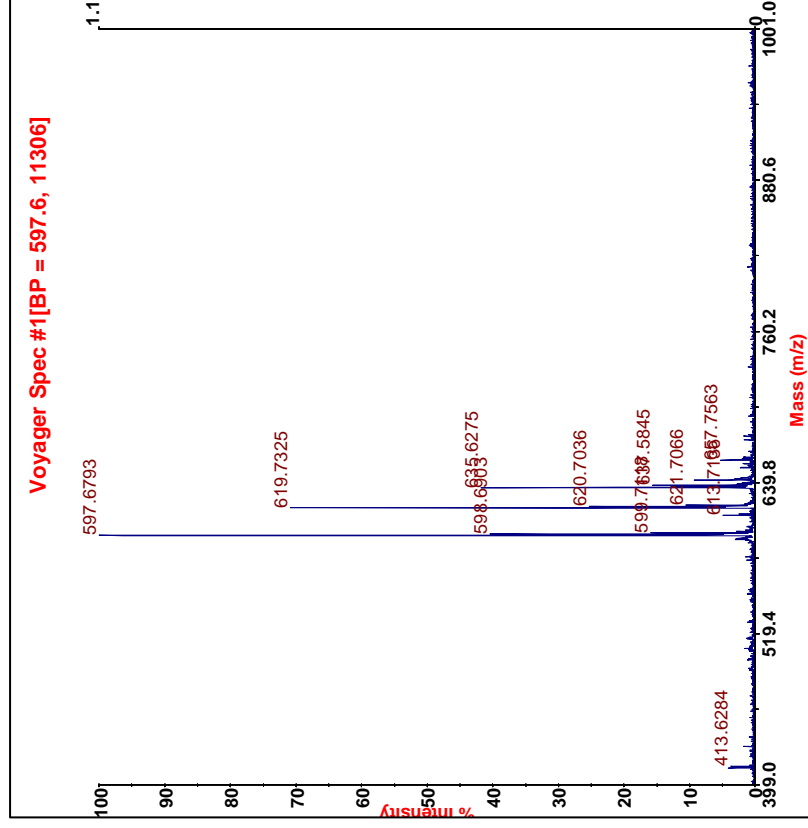

# C(Mob)YIQNC(Mob)PLG-CONH<sub>2</sub>

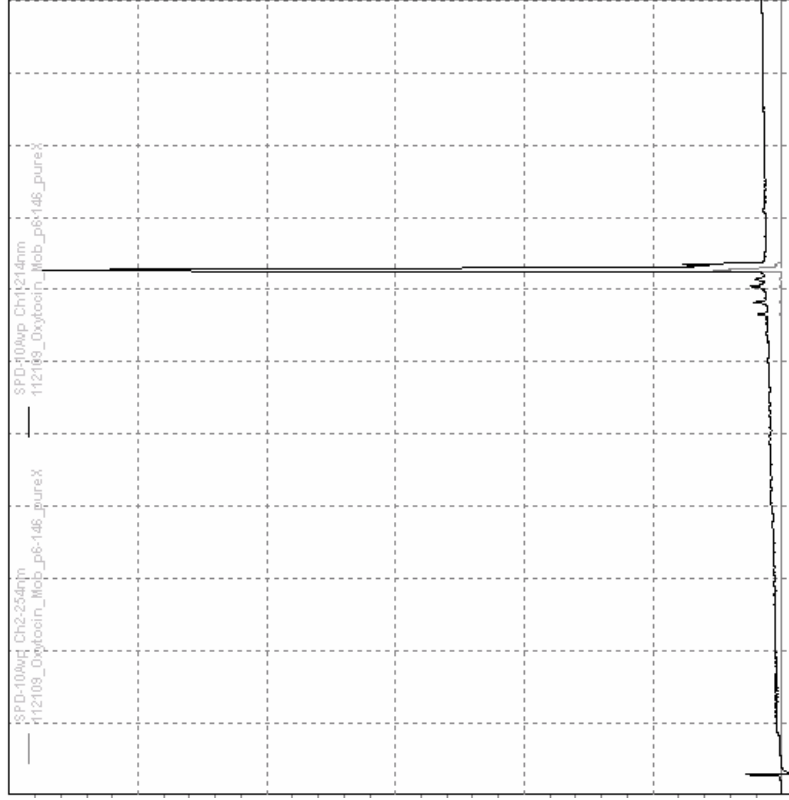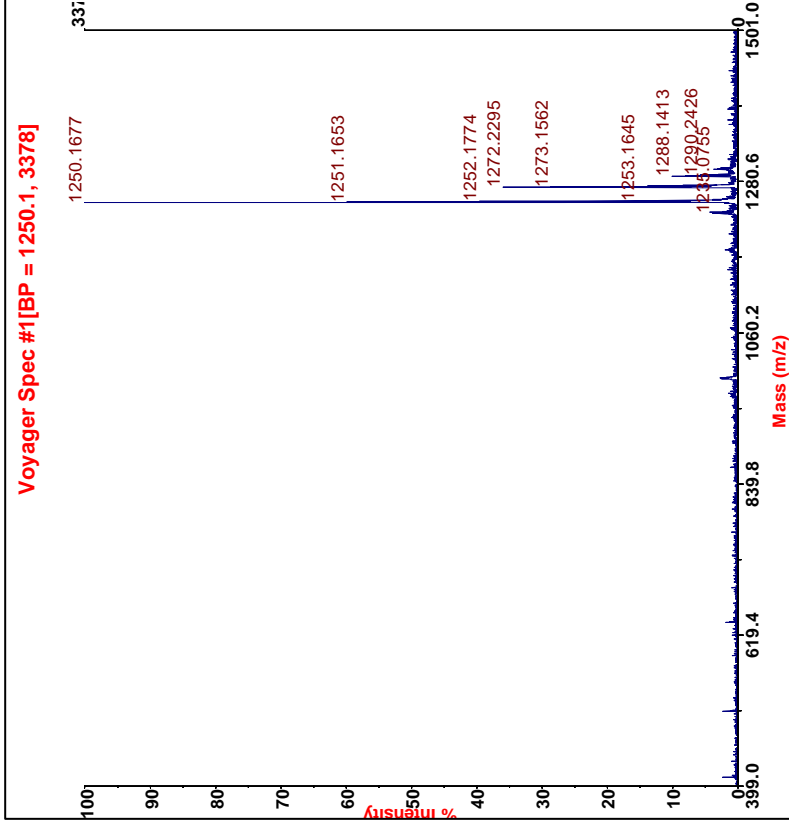

# C(tBu)YIQNC(tBu)PLG-CONH<sub>2</sub>

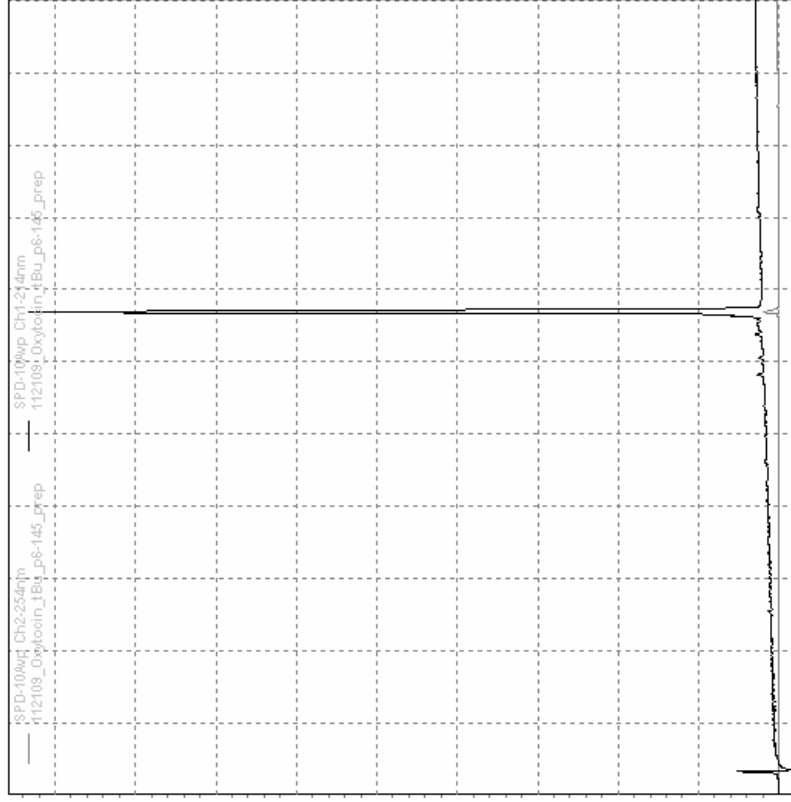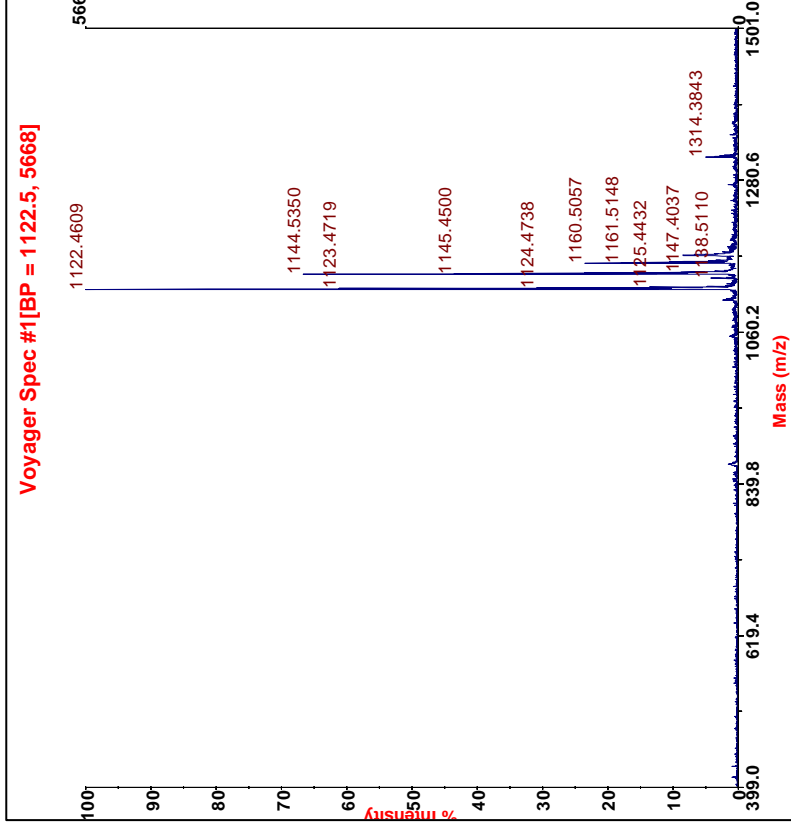



# C(Acm)YIQNC(Acm)PLG-CONH<sub>2</sub>

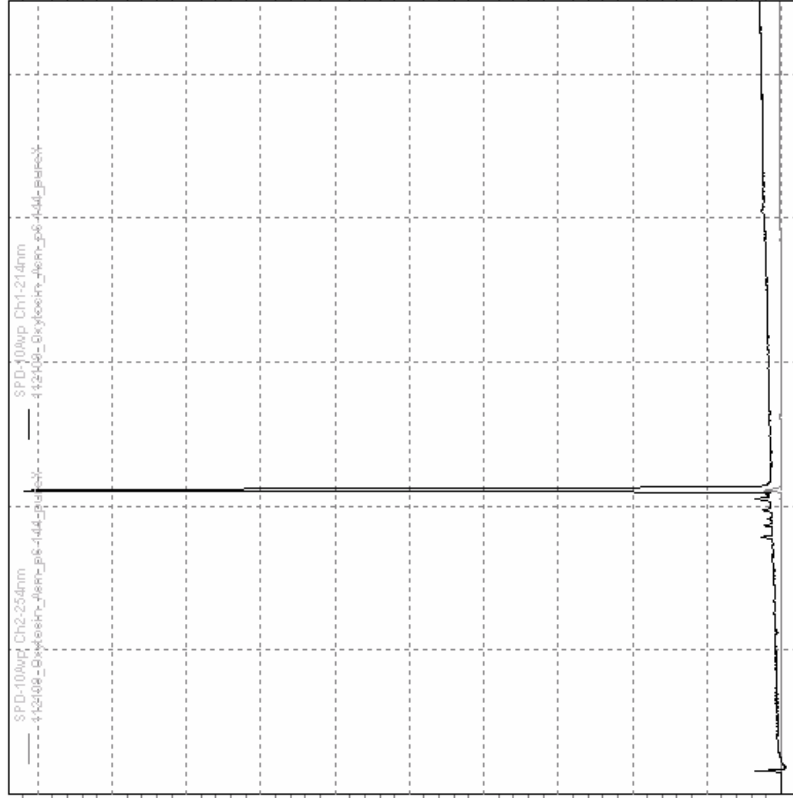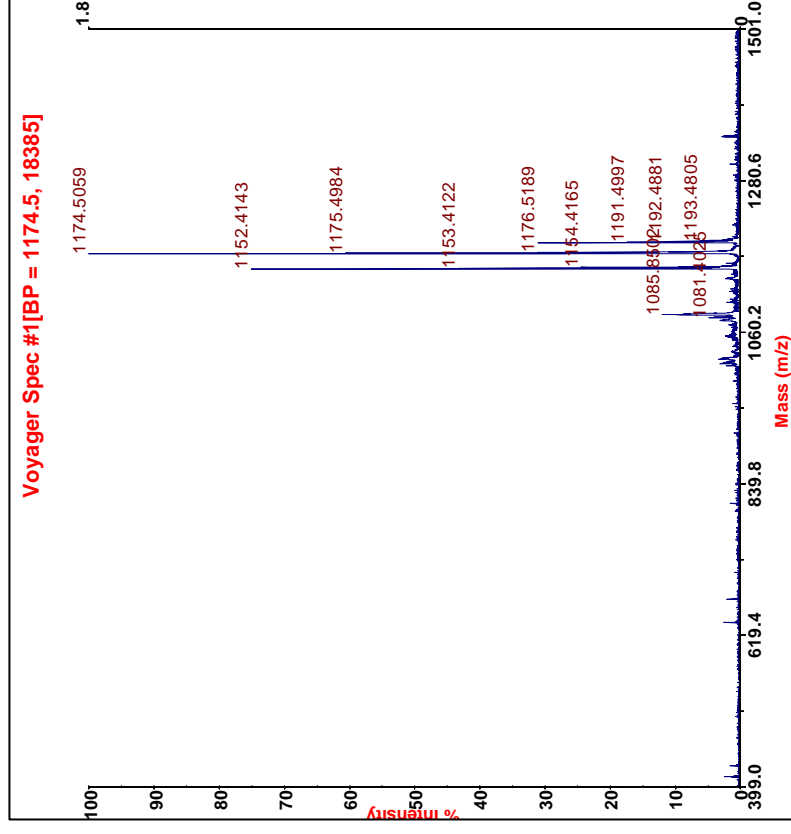

# C(StBu)YIQNC(StBu)PLG-CONH<sub>2</sub>

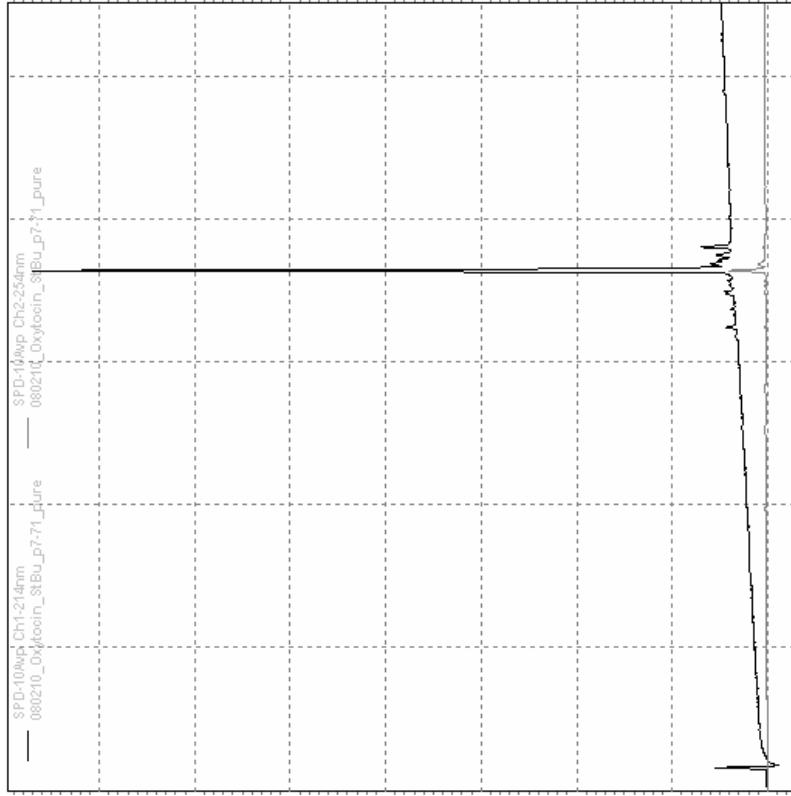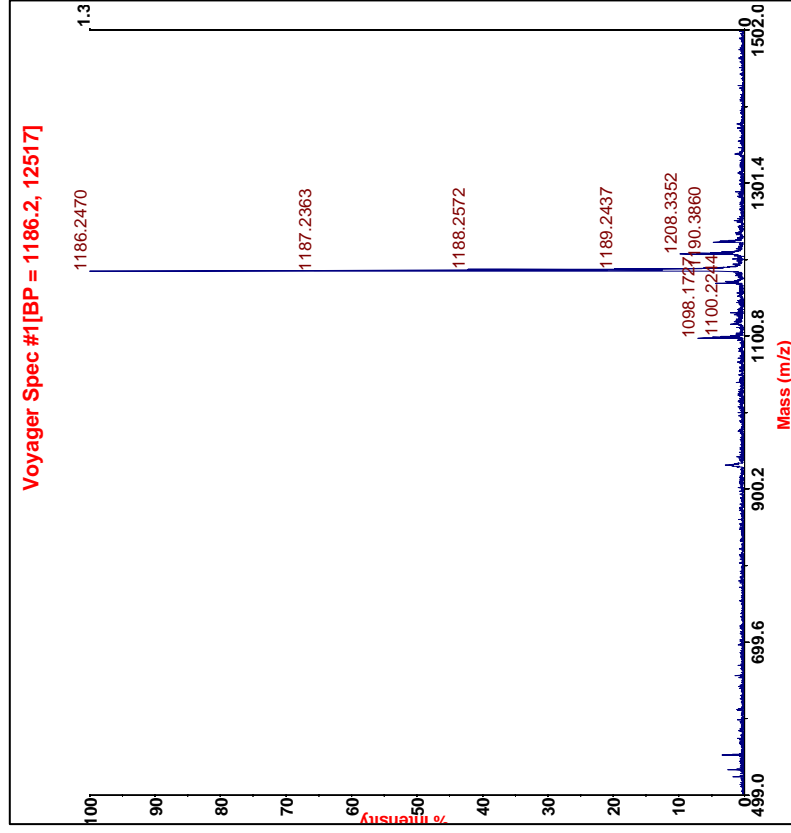

**C<sub>(Acm)</sub>NC(SH)KAPETALC<sub>(Acm)</sub>ARRC(SH)QQH-COOH**

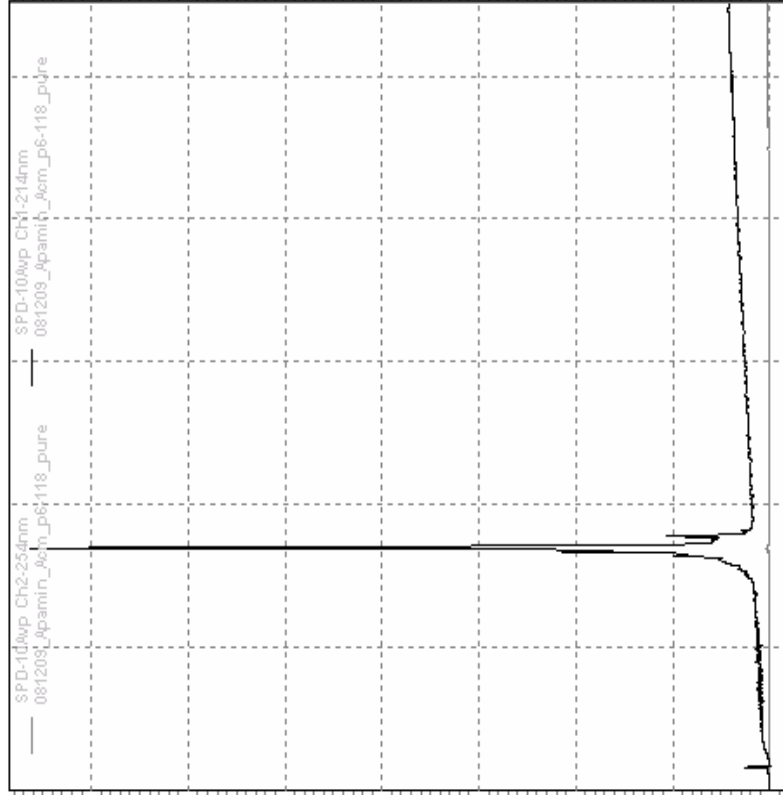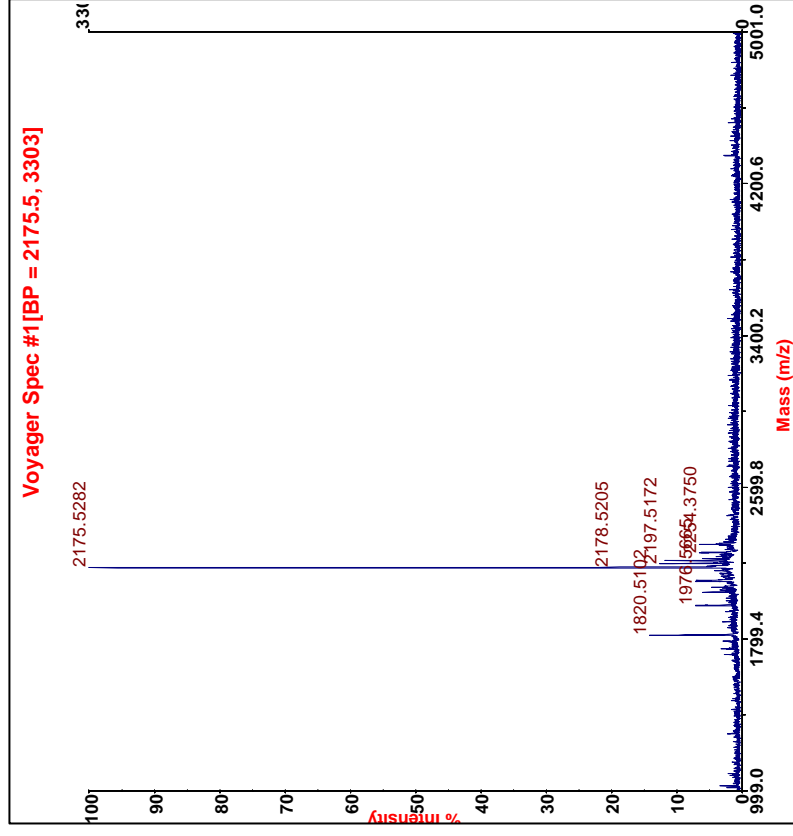

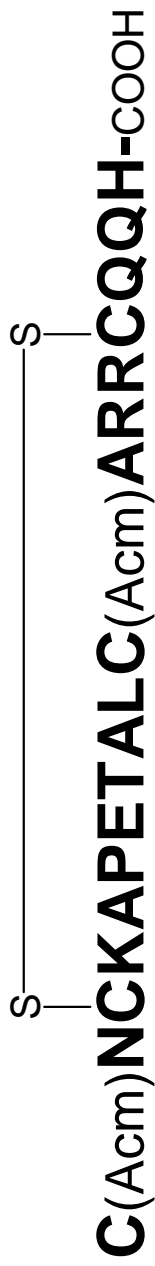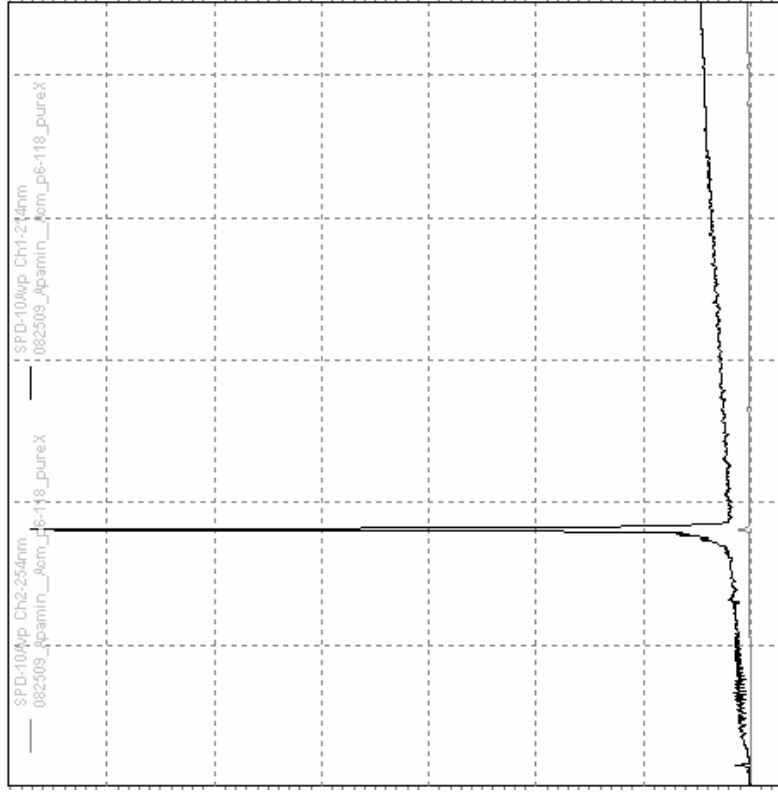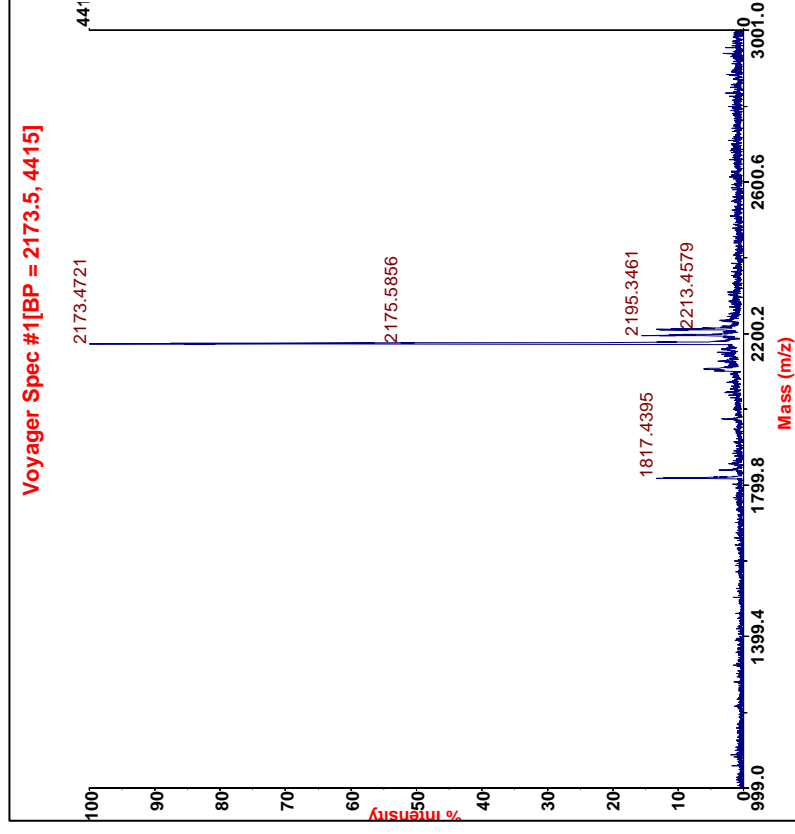

# C(tBu)NC(SH)KAPETALC(tBu)ARRC(SH)QQH-COOH

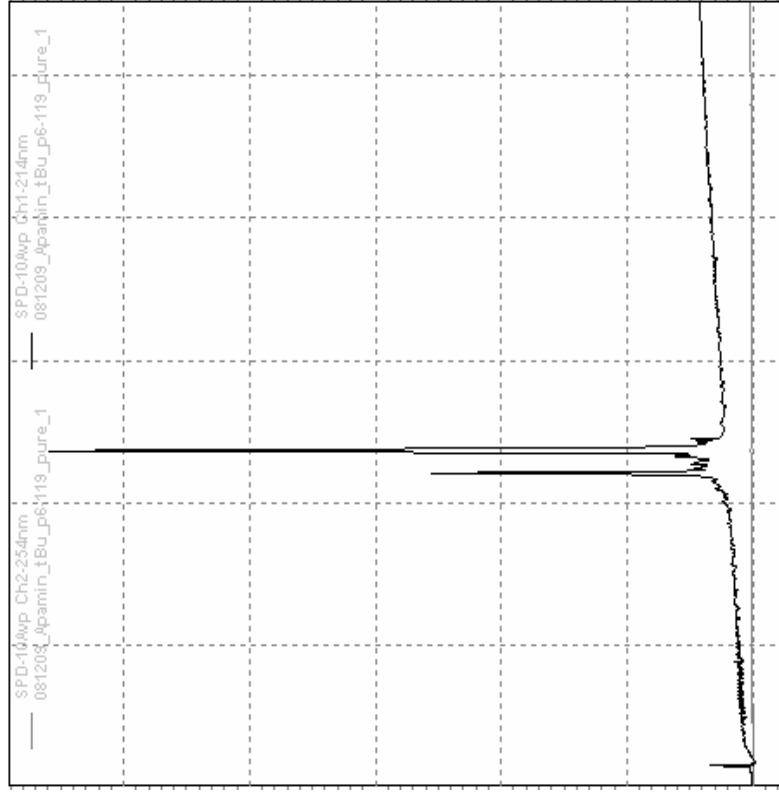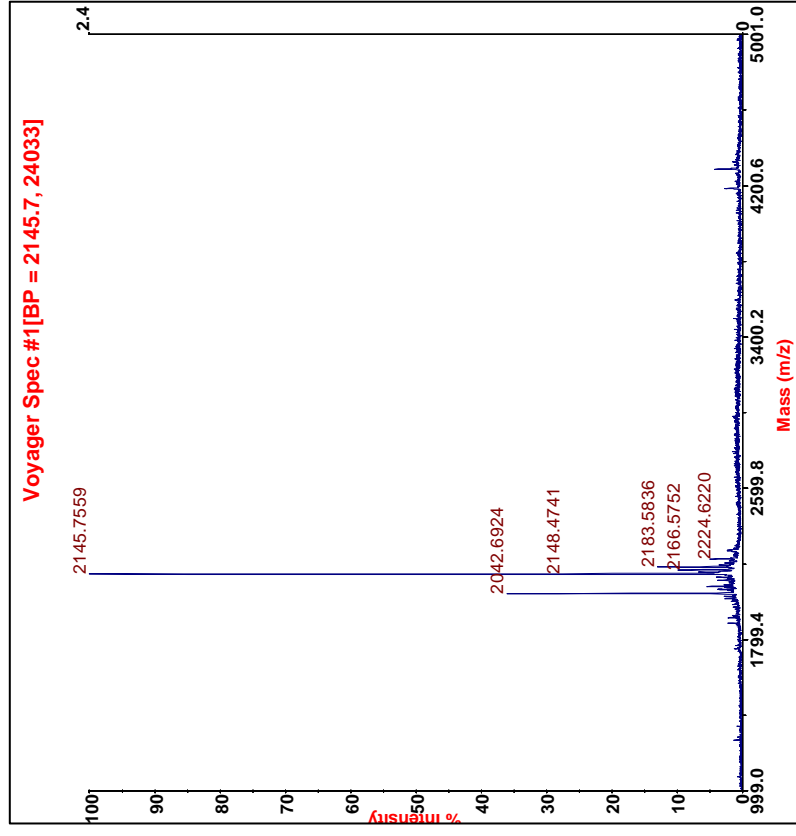

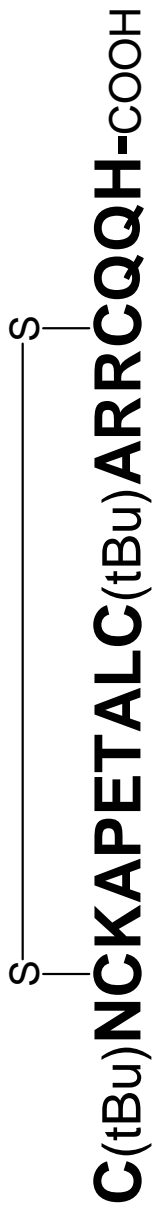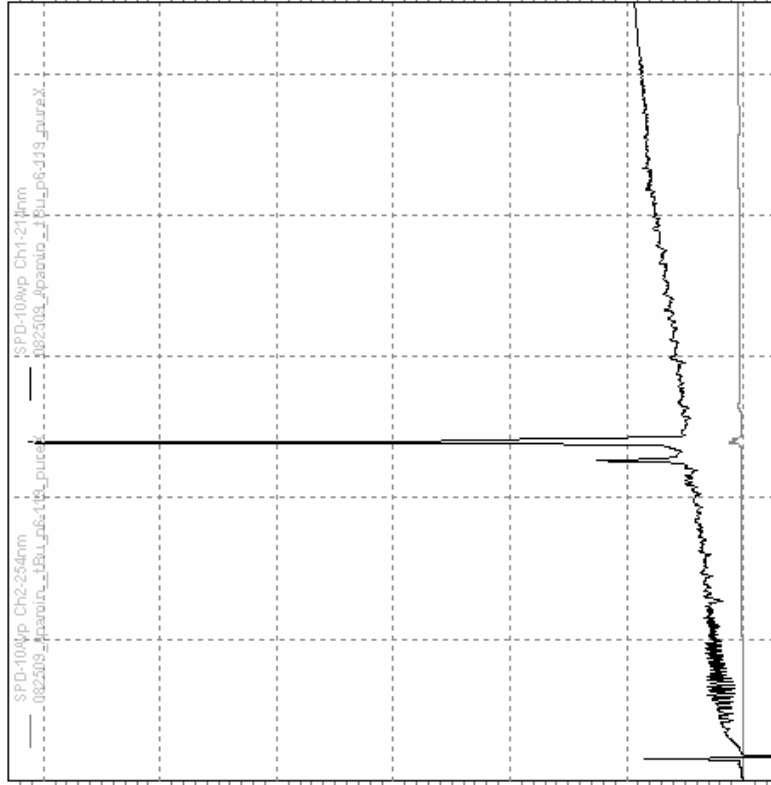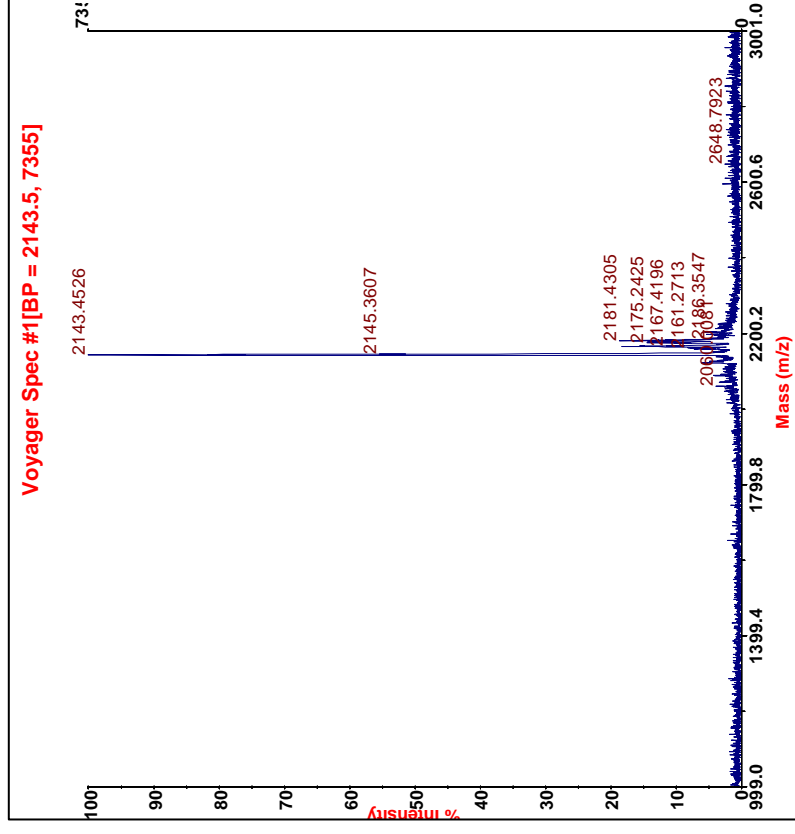

# C(Mob)NC(SH)KAPETALC(Mob)ARRC(SH)QQH-COOH

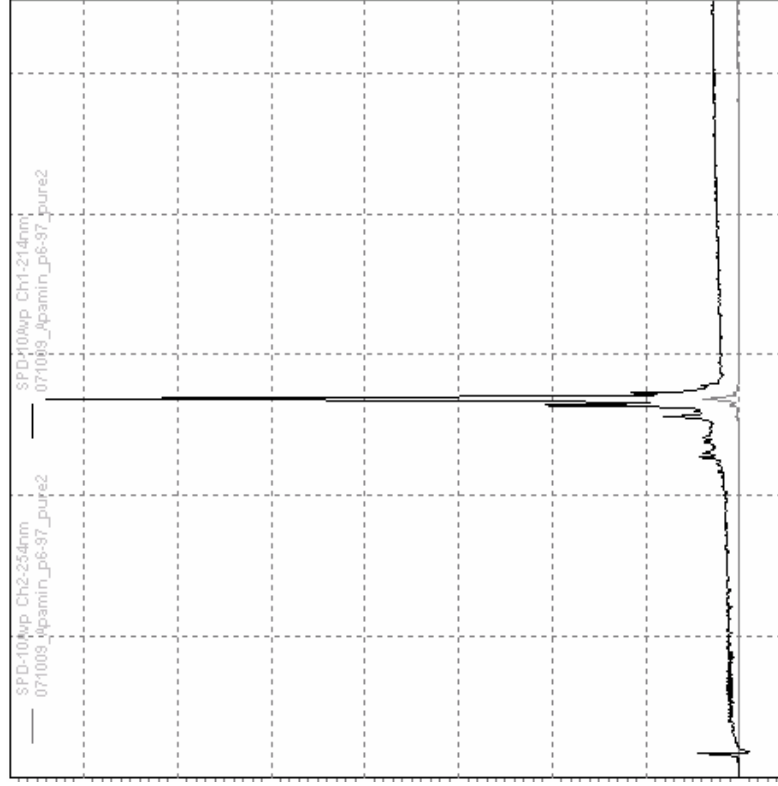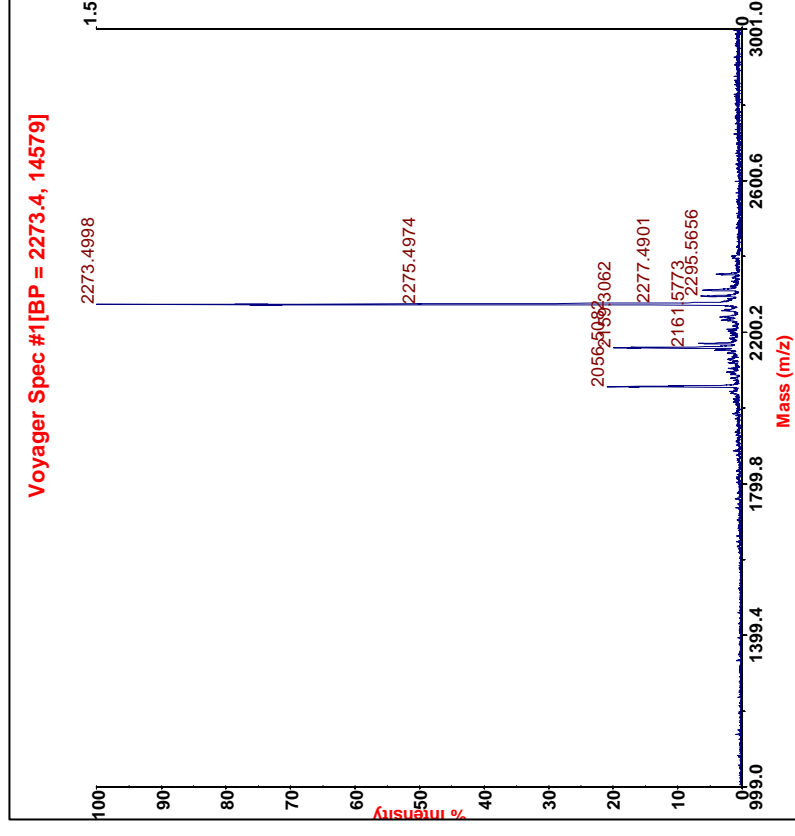

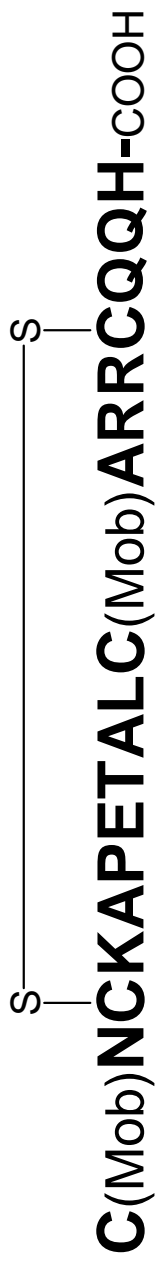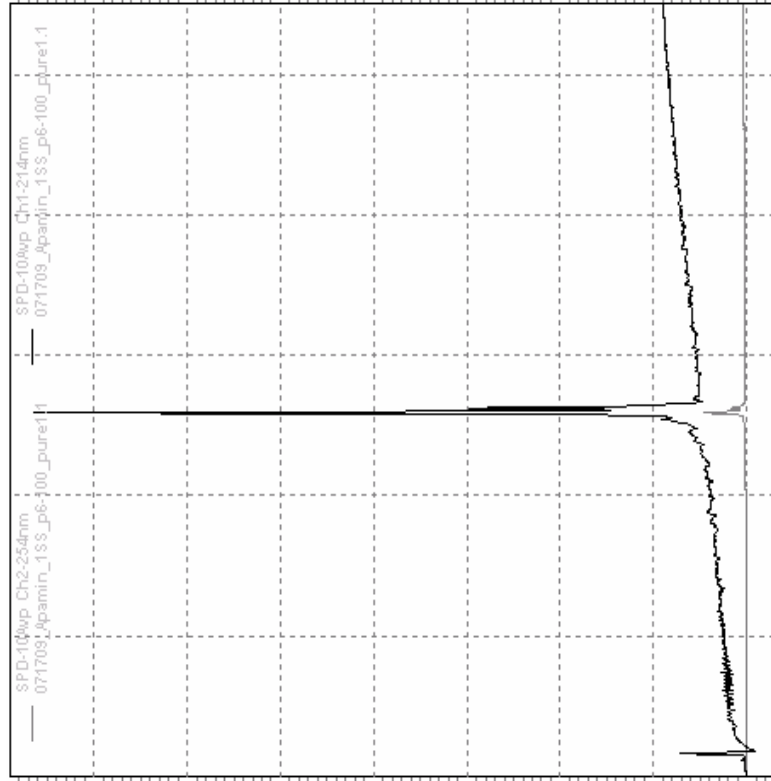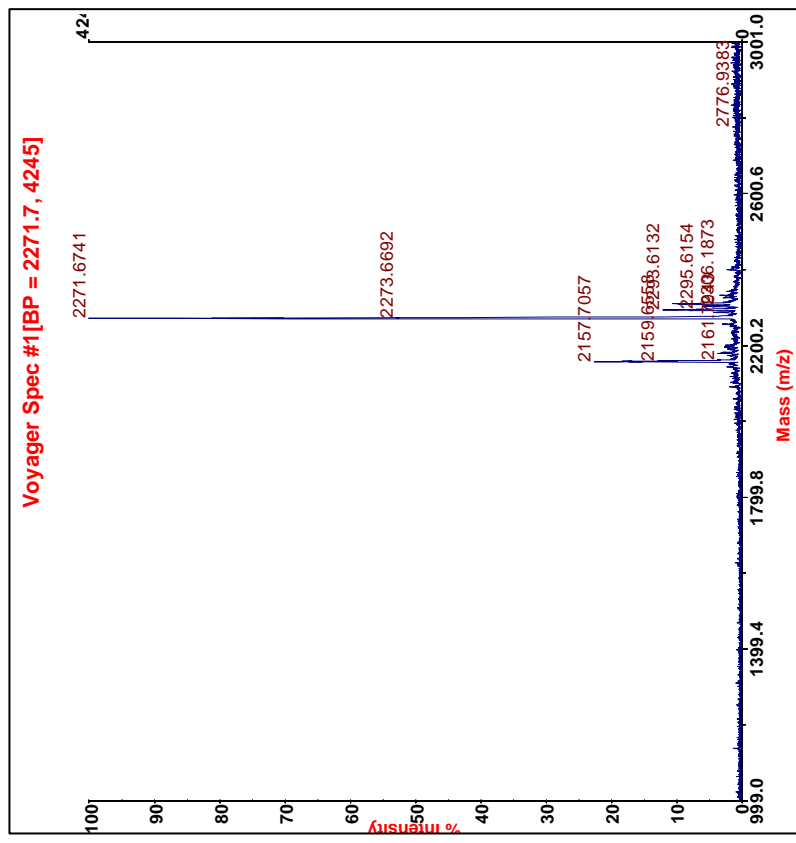



# C(StBu)NC(tBu)KAPETALC(StBu)ARRC(tBu)QQH-COOH

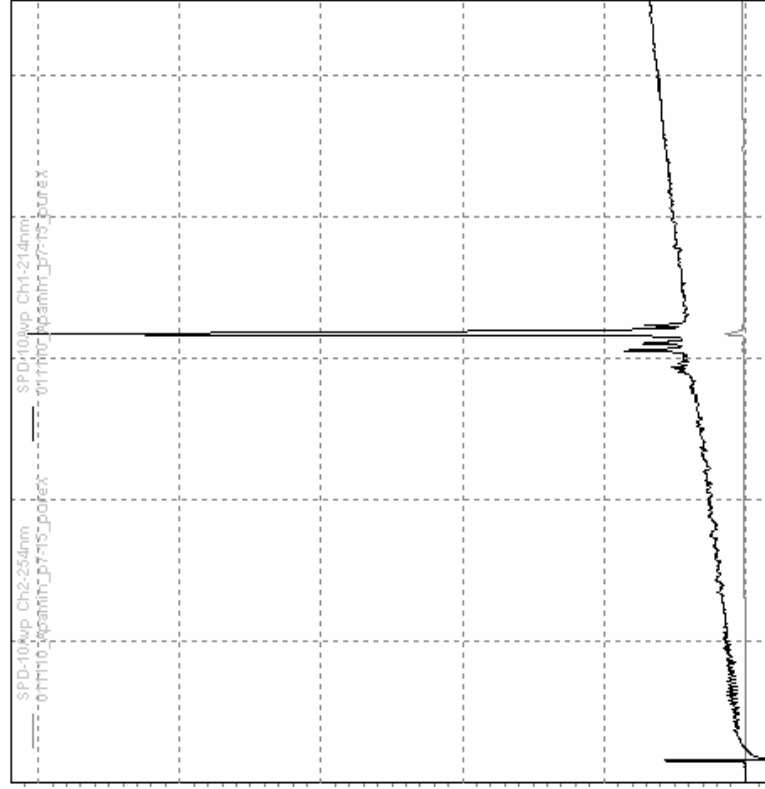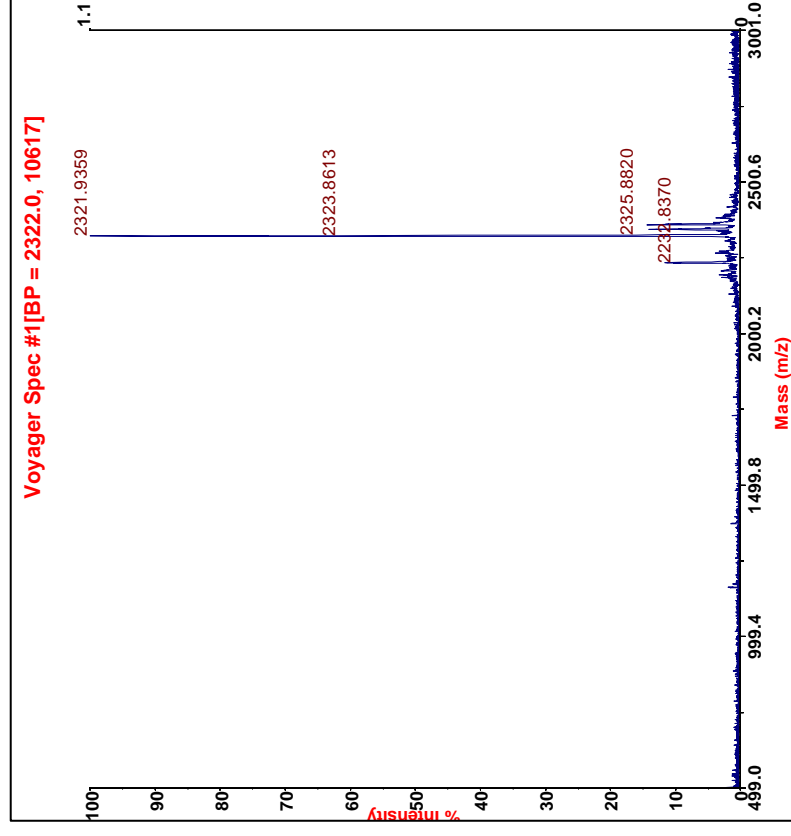

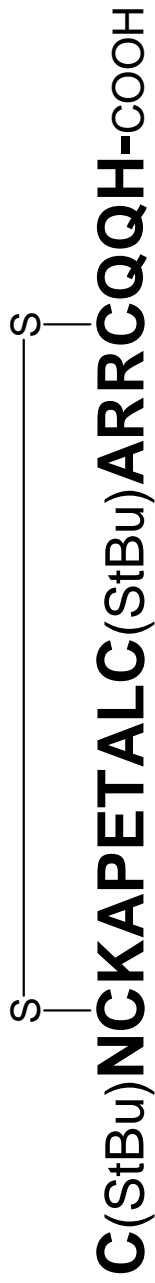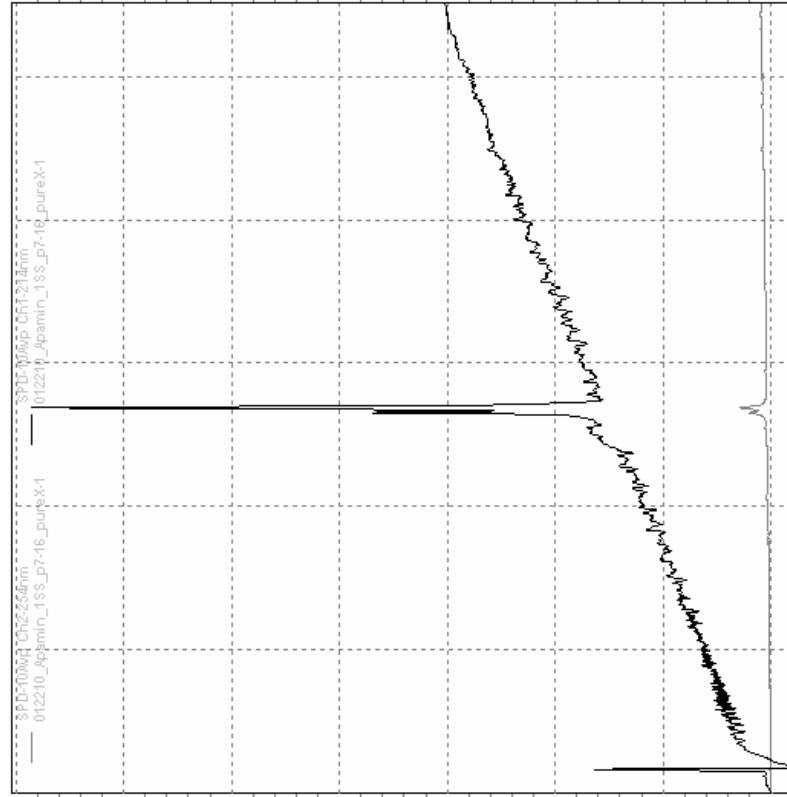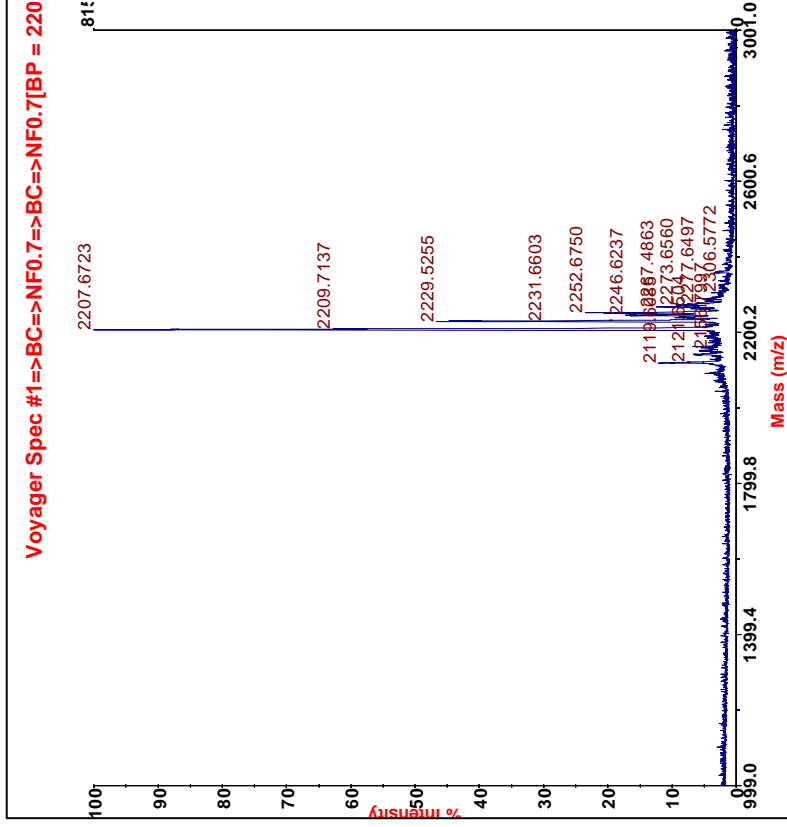

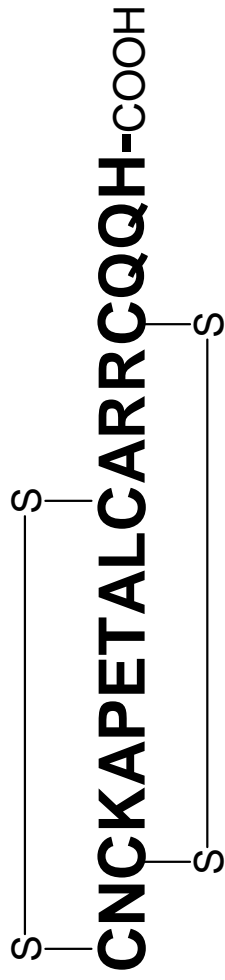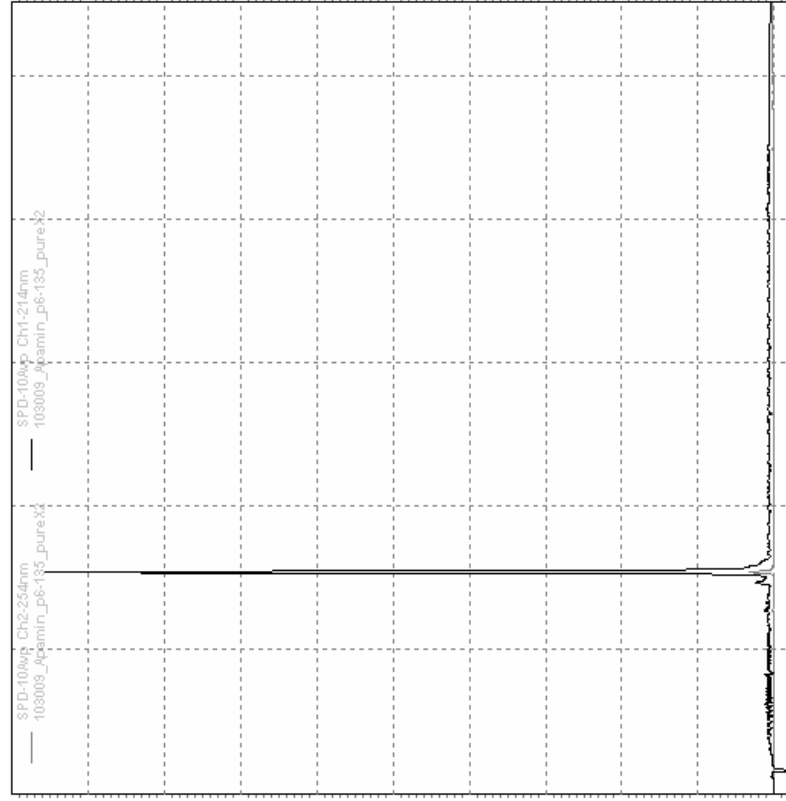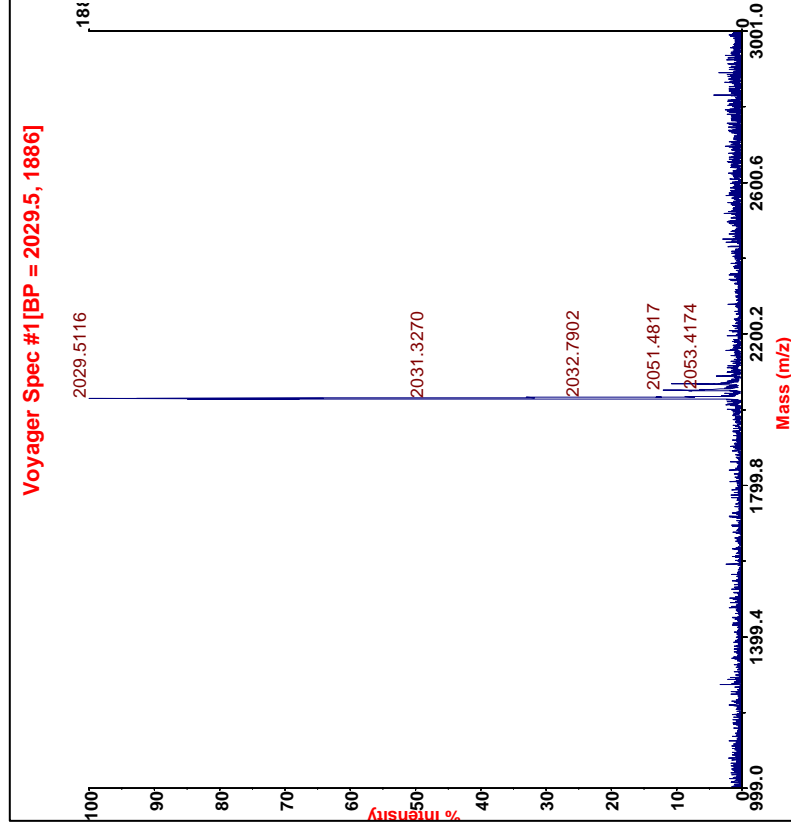

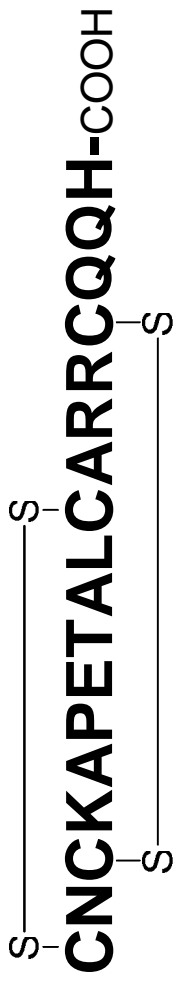

**Authentic Apamin Sample**  
 (American Peptide Company, Sunnyvale, CA)

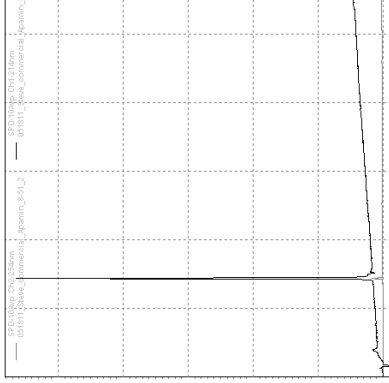

Expanded Chromatogram (14-16 min)

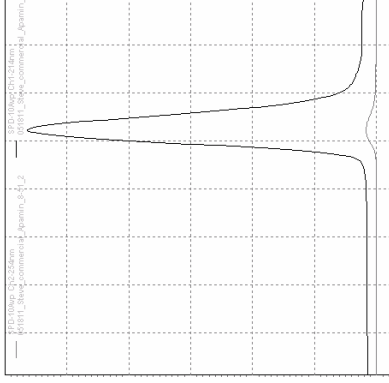

**Synthesized Apamin Sample**

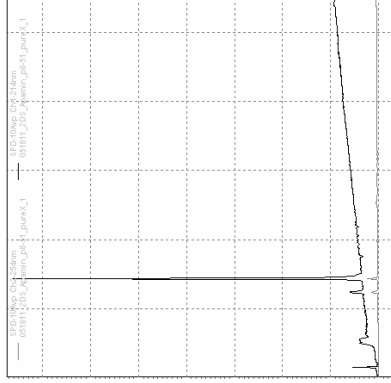

Expanded Chromatogram (14-16 min)

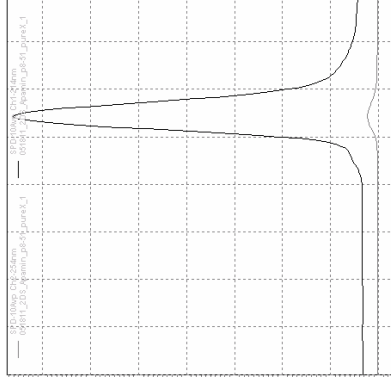

**Apamin Co-injection**

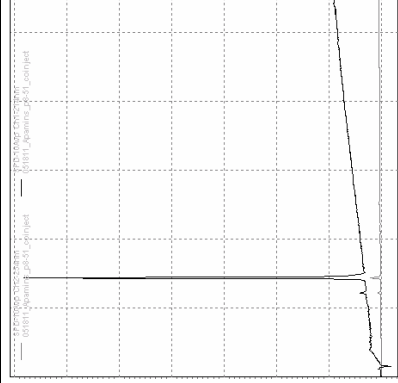

Expanded Chromatogram (14-16 min)

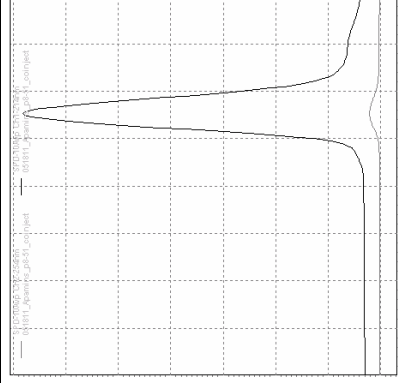

Supplement: NIHMS326037-supplement-Supplementary_information.pdf [file NIHMS326037-supplement-Supplementary_information.pdf]
